# Supplementary material for: OneZoom: A Fractal Explorer for the Tree of Life
Source: PubMed Central journal article supplement (PMC3472976; doi:10.1371/journal.pbio.1001406), 2012-10-16
Supplement: pbio.1001406.s003.pdf [file pbio.1001406.s003.pdf]

# 1 **Appendix A: Algorithm details**

2

## 3 *The basics of fractal plotting*

4

5 One common method for plotting fractals that mimic the shapes of trees and  
6 plants is to use 'L-Systems'. The L-system technique involves a string of  
7 commands such as move forward, turn right and turn left. These commands  
8 define a path that, when plotted with a line, produce the desired fractal. The  
9 string of commands is 'grown' from an initial base string by iteratively replacing  
10 certain individual commands with strings of more complex ones. The greater the  
11 number of iterations, the more intricate the resulting shape will be.

12 Mathematically speaking, the fractal is a theoretical object that appears as the  
13 number of iterations approaches infinity.

14

15 For example, to draw a simple fractal tree the base set of commands might define  
16 a trunk that splits into two branches. The iterative process would then replace  
17 each branch command with the command to draw a trunk and two branches,  
18 only at a smaller size. After a single iteration the image has a trunk, two medium  
19 branches and four small branches. After two iterations, it also has a further 8  
20 very small branches and so on (see Figure A1). It is clear that this method could  
21 be modified to create a tree structure that could then be labeled with  
22 information and display a phylogeny. The lines of the fractal are of variable  
23 thickness so that the trunk of the tree is not only longer but also broader than the  
24 twigs. The text size scales proportionally with the width of the branches so that it

25 fits inside the tree itself rather than forming part of the background, we found  
26 this to be a more natural and visually pleasing way to embellish the tree shape  
27 with data. By giving the ability to zoom into the structure, information can be  
28 expanded and read that was initially invisible because its size was smaller than a  
29 pixel on the screen. For any split of a branch into two smaller branches, the  
30 width and length of the two smaller branches are defined as a function of the  
31 width and length of the larger branch. This results in a 'path' of information  
32 getting smaller and smaller that a user can follow intuitively by zooming in.  
33

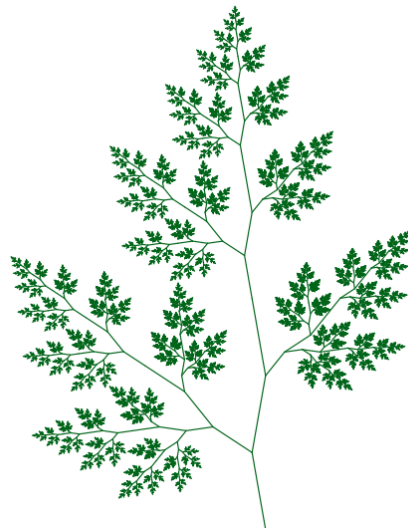

34

35

36 *Figure A1: An example fractal that resembles plant growth – produced in R (R*

37 *Development Core Team 2012) using only 17 lines of code.*

38

39

## 40 *The OneZoom plotting algorithms*

41

42 Our algorithms do not explicitly store the string of commands that draws the  
43 fractal (as would be done in a classic L-system plot). Instead, we execute the  
44 drawing commands as they are created by using a recursive plotting function.  
45 This function repeatedly calls itself, using different parameters that create the  
46 more detailed parts of the image. To prevent the code from iterating indefinitely,  
47 we include an *if* statement that stops the drawing process when branches  
48 become too small to be visible at the current scale. We can illustrate the basic  
49 functionality of drawing trees in OneZoom with some pseudo code. The code has  
50 the following variables:

51

### 52 **Parameters:**

53  **$0 < \text{ratioL} < 1$  ,  $0 < \text{ratioR} < 1$**  (*gives the length of the new left/right hand*  
54 *branches as a ratio with the current branch length*)  
55  **$-\pi < \text{angleL} < \pi$  ,  $-\pi < \text{angleR} < \pi$**  (*gives the angle of the new left/right hand*  
56 *branch compared to the current branch. A zero indicates that it is just a*  
57 *continuation of the current branch*)  
58 **thickness** (*gives the thickness to length ratio wanted for all lines*)  
59 **threshold** **> 0** (*gives the size of the smallest branch worth drawing, set at half a*  
60 *pixel for most detailed graphics, or set at larger values to increase plotting speed*)

### 61 **Variables:**

62  **$\mathbf{X}$  ,  $\mathbf{Y}$**  (*the coordinates of the path, initialised with the position of the base of the*  
63 *trunk, typically 0,0*)

64 **angle** (*the angle of the path's current direction where zero means vertically up,*  
65 *initialised with the angle of the tree, typically 0)*

66 **length** (*the length of the current branch, initialise with the size of tree required*)

67

68 Using these inputs, we can draw a tree.

69

70 **Function: Draw\_Tree ( X , Y , angle , length ) {**

71 **if (length > threshold ) {**

72 **Draw branch of given length and angle, starting at X , Y**

73 **and having width given by (length \* thickness)**

74 **Update the values of X and Y to reflect the end of that**

75 **branch, rather than the start.**

76 **Draw\_Tree ( X , Y , angle+angleR , length \* ratioR)**

77 **Draw\_Tree ( X , Y , angle+angleL , length \* ratioL)**

78 **}**

79 **}**

80

81 The phylogenetic tree is stored as an object-oriented structure where each node  
82 contains a branch length, node name and two child node objects (which could be  
83 null if the node is a leaf). Given this storage method, the above algorithm  
84 becomes extremely efficient. A node has the ability to plot itself (which  
85 effectively plots the tree that descends from that node) by first drawing its  
86 descendent branch, and then asking its child nodes to plot themselves, passing  
87 down the appropriate parameters of position and scale. If a node is a leaf, then a

88 special plotting function draws a tip of the tree containing text in a leaf shape  
89 rather than drawing child nodes.

90

91 The angles between the branches, and the successive ratios of branch lengths can  
92 all be varied, and different possible choices give rise to distinct views of the tree.

93 In OneZoom, there are three prewritten examples available, and a button allows  
94 users to quickly and easily switch between them. In all cases, we used the

95 richness of the two clades at any split to decide which clade is drawn on the right

96 hand branch and which on the left hand branch. The richer branch normally goes

97 to the right (e.g. the tree is ladderised), but the direction (and the angles and

98 ratios) can also work on an alternate basis to provide a different appearance.

99

100 One has to be extremely careful to select parameters (or functional forms) for

101 the angles and ratios that do not cause the tree to be drawn with different parts

102 overlapping one another. In OneZoom, non-overlap is guaranteed for all

103 functional forms except those where the parameters are variable and set by the

104 balance of the tree. Even in this case, non-overlap is very rare, and could be

105 resolved in the future with more advanced algorithms. We expect future

106 algorithms to be able to create other iteratively created tree structures with

107 complementary properties to those of the three existing views.

108

109 *Zooming, Translating and Optimisation*

110

111 In OneZoom, we look at the IFIG through a 'window' so that anything outside the  
112 'window' is not seen on screen and anything inside it is plotted. A larger  
113 'window' would allow more of the IFIG to be displayed and thus graphics  
114 elements would appear smaller on screen as a result. Conversely, a smaller  
115 'window' would mean only a tiny part of the IFIG is expanded to fill the display  
116 and graphics elements would appear larger on screen, but we would see fewer of  
117 them. OneZoom actually operates by keeping the 'window' stationary and of a  
118 fixed size so instead of moving and resizing the window, one equivalently moves  
119 or resizes the IFIG itself.

120

121 All the graphics elements that may need to be drawn in the IFIG can be  
122 associated to a particular node of the phylogenetic tree data structure. Each node  
123 typically encompasses some text, a section of branch expressed as a Bezier curve  
124 and a joint or tip expressed as a circle or leaf shape, this could be changed in the  
125 future to accommodate new and alternative plotting styles. Also stored in each  
126 node is a 'horizon', which corresponds to the smallest rectangle that could  
127 contain the graphics elements of that node and all its descendant nodes. The  
128 horizon is never drawn, but it speeds up the plotting process considerably as any  
129 node for which the horizon does not intersect the 'window' need not be  
130 considered further. The positions and parameters of all graphics elements  
131 including the horizon are pre-calculated in order to keep OneZoom as fast and  
132 responsive as possible after the initial load time.

133

134 The IFIGs corresponding to trees with thousands of tips are so large that  
135 conventional graphics techniques will not work - the precision of the numerical

136 calculations is not sufficiently accurate to pinpoint individual elements on such a  
137 large canvas. To resolve this problem, the positions and scales of all the graphics  
138 elements in any particular node of the tree are stored in reference to the parent  
139 node's position and scale, this does not require high precision as the parent node  
140 would not be far away or very different in size. The position and scale of the  
141 complete IFIG can thus be defined by the position and scale of any single chosen  
142 'anchor' node against which all the others elements in the IFIG can be referenced.  
143 The node that we identify as the 'anchor' node changes dynamically during  
144 exploration of the IFIG so that it remains close to the 'window' and at a similar  
145 scale, otherwise numerical errors would again cause a problem.

146

147 The graphics elements in any part of an IFIG are only drawn if they are larger  
148 than a certain threshold size. Extra CPU power, if available, can be used to  
149 provide a more detailed view of the IFIG by decreasing the threshold, however  
150 the IFIG can be explored perfectly well with larger thresholds. Similarly, extra  
151 screen resolution allows more details of the IFIG to be displayed simultaneously  
152 but we have found the experience of exploring the IFIG to be acceptable on  
153 screen areas no larger than that found on a smart phone. The concept is thus  
154 very flexible for although it does not rely on emerging technologies to be  
155 effective, it can make use of them to enhance the user experience.

156

157 The image tiling method employed by Google maps could perhaps be used as an  
158 alternative to our algorithms here, but it seems more efficient to exploit the  
159 hierarchical structure of the graphics elements as a storage method and thus  
160 retain the benefits of an adjustable detail threshold. If we did use the tiling

161 method, our above algorithms would still have to be run to create the original  
162 tiles as vector graphics. There would be a large number of tiles and thus load  
163 times and memory requirements for processing newly inputted data would be  
164 significantly higher.

165

### 166 *Smooth exploring with pre-fetching*

167

168 The present IFIG examples load all the information into RAM when the page is  
169 opened. This takes just a few seconds for a 30,000-tip tree, but takes 3 minutes  
170 and 2Gb of RAM to load a 1.2 million tip dated tree with species names (On a  
171 2009 model 13 inch MacBook Pro laptop). After the initial load time, exploration  
172 of the entire tree is completely smooth. Future versions of OneZoom could be  
173 improved so that only limited areas of the space were preloaded at a time and  
174 pre-calculations could be stored at the server level. This would be necessary to  
175 browse larger trees still where there are pictures and other metadata that need  
176 to be displayed in addition to the tree topology, it would also enable an almost  
177 instantaneous initial load time and use of the software on devices with less  
178 available RAM. However, even the current version of OneZoom can smoothly  
179 display very large phylogenetic trees. The main text includes screenshots from  
180 an IFIG of a 408,135-tip phylogeny.

181

### 182 *Opening the IFIG*

183 You can open the IFIG .html file in any web browser that supports the html5  
184 canvas element. If you open the IFIG and see only buttons then your browser  
185 needs to be updated to use OneZoom. All modern mainstream browsers should



186 open the IFIG but the recommended browsers are: Safari (Mac), Firefox (Mac),  
187 Firefox (PC) and Google Chrome (PC). The tutorial button should (when  
188 pressed) give a full explanation of how to browse the IFIG in OneZoom

189

### 190 *Data input specifications*

191 To load your own data, the tree needs to be in Newick format, ultrametric, with  
192 branch lengths and with polytomies expressed as branches of length zero. Leaf  
193 names should be labeled with the convention 'Genus\_species'. Naming of interior  
194 nodes is optional, but is fully supported. At the top of the html file (when opened  
195 in a text editor rather than a browser), there is a place to copy and paste your  
196 data together with comments that show how to customise the IFIG to your  
197 personal requirements so that it may become supplementary material for your  
198 own work. At present inputting your own trait data requires quite heavy editing  
199 of the code but we hope to make that easy in future versions of OneZoom.

200
